# Supplementary material for: Targeting the Eph/Ephrin System as Anti-Inflammatory Strategy in IBD
Source: PubMed Central journal article supplement (PMC6606944; doi:10.3389/fphar.2019.00691), 2019-06-17
Supplement: DataSheet_1.pdf [file DataSheet_1.pdf]

**Supplementary Table 1: Effects of IgG1-Fc on TNBS-induced inflammatory responses**

Disease Activity Index (DAI1-4), macroscopic score, colonic length and thickness, colonic and lung MPO activity assessed in TNBS-treated mice administered with vehicle (Control) (n=10-12 independent values) or IgG1-Fc 10 $\mu$ g/kg s.c. (n= 6 independent values). \*P<0.05 vs. C mice, one-way ANOVA followed by Bonferroni's post-test.

|                            | Control         | IgG1-Fc         |
|----------------------------|-----------------|-----------------|
| DAI 1                      | 0               | 0               |
| DAI 2                      | 2.7 $\pm$ 0.1   | 2.7 $\pm$ 0.3   |
| DAI 3                      | 3.8 $\pm$ 0.1   | 3.5 $\pm$ 0.4   |
| DAI 4                      | 4.8 $\pm$ 0.2   | 3.7 $\pm$ 0.6   |
| Macroscopic score          | 3.5 $\pm$ 0.3   | 2.3 $\pm$ 0.4   |
| Colonic length (cm)        | 5.2 $\pm$ 0.1   | 6.2 $\pm$ 0.2*  |
| Colonic thickness (mg/cm)  | 61.7 $\pm$ 2.3  | 60.7 $\pm$ 2.0  |
| Colonic MPO activity (U/g) | 67.9 $\pm$ 16.6 | 60.7 $\pm$ 23.0 |
| Lung MPO activity (U/g)    | 67.4 $\pm$ 10.8 | 33.3 $\pm$ 9.5  |

**Supplementary Table 2: Effects of EphB4 and CsA on viability of splenic mononuclear cells**

Percent viability of cultured mononuclear cells, assessed through trypan blue exclusion assay, after 24h incubation with vehicle, CsA 1 $\mu$ g/ml or EphB4 (10-100ng/ml) in the presence of PMA and ionomycin (n=3-4 independent values).

| Treatment         |     | Viability (%) |
|-------------------|-----|---------------|
| Vehicle           |     | 96 $\pm$ 3    |
| CsA ( $\mu$ g/ml) | 1   | 90 $\pm$ 8    |
| EphB4 (ng/ml)     | 10  | 98 $\pm$ 1    |
|                   | 100 | 98 $\pm$ 1    |

**Supplementary Figure 1: Effects of EphB4 on TNBS-induced inflammatory responses**

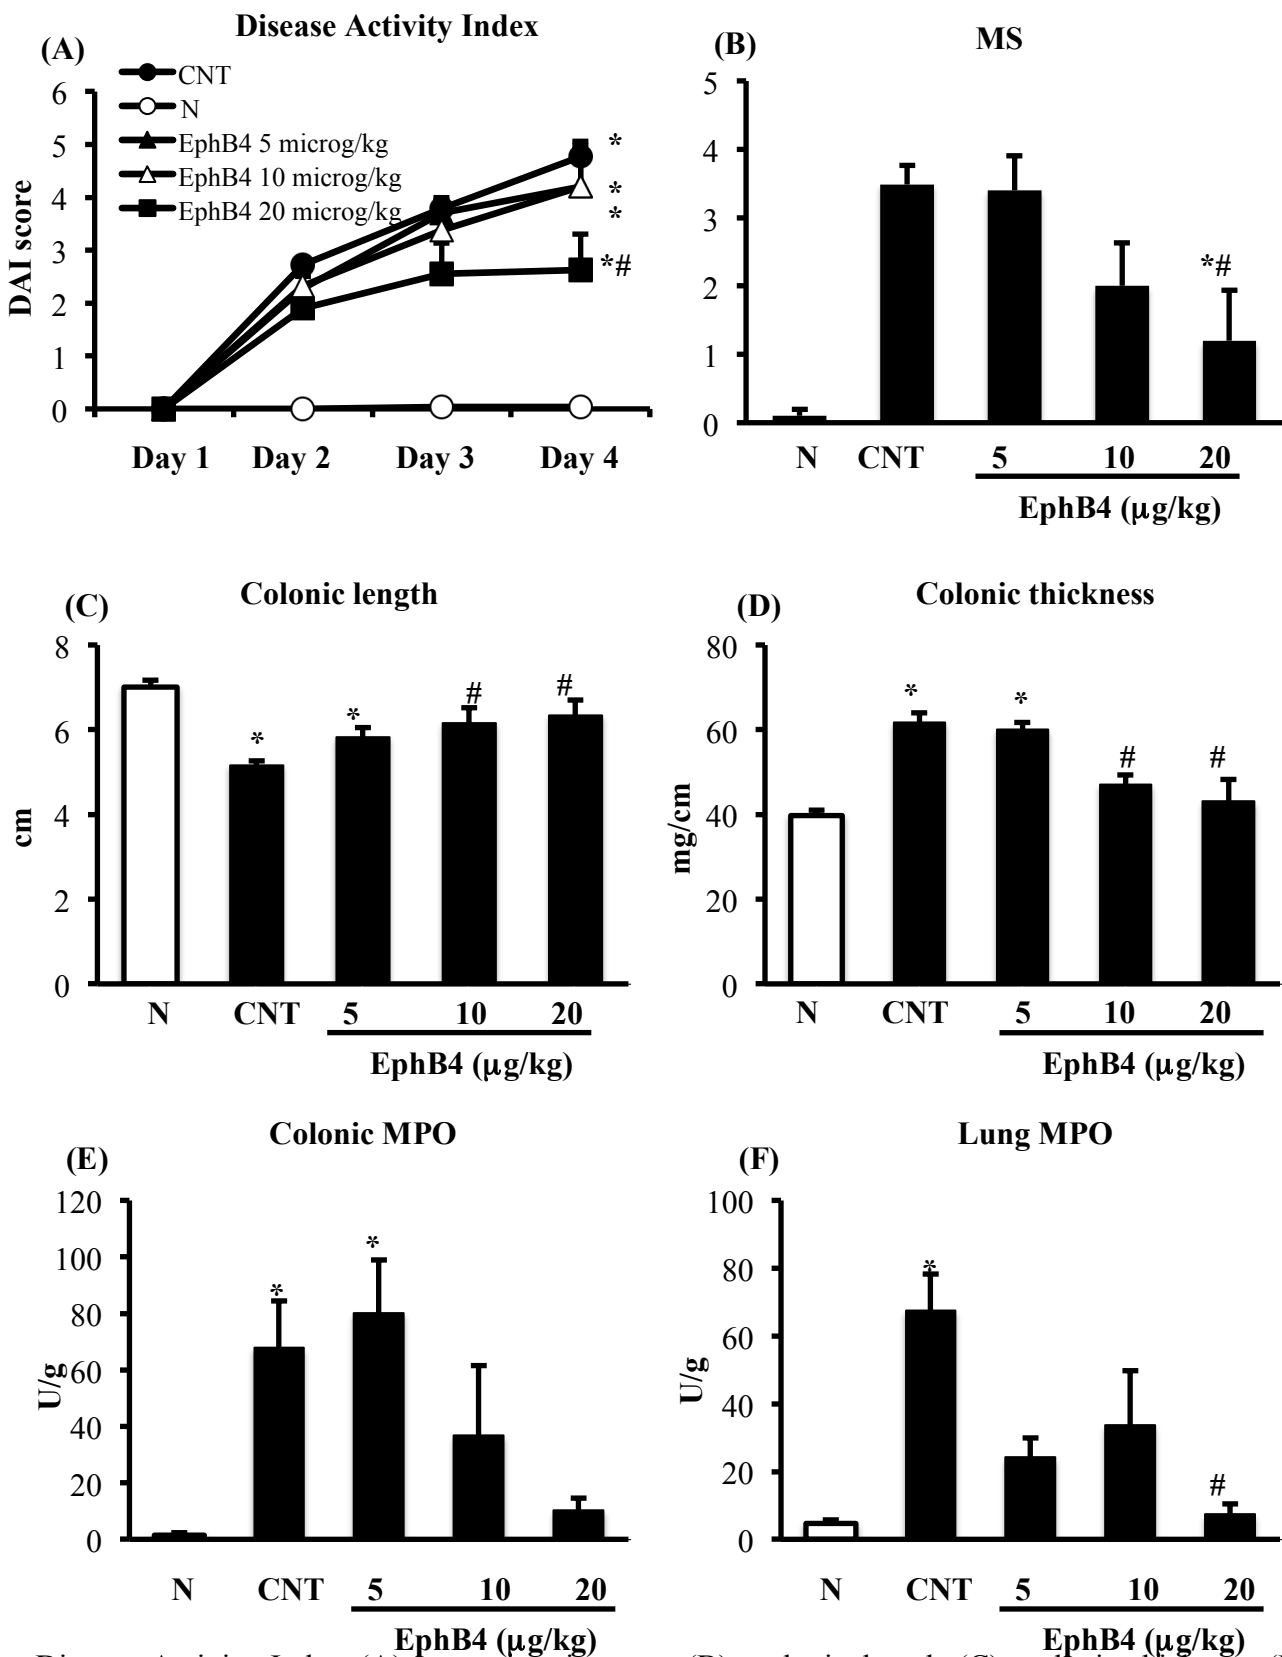

Disease Activity Index (A), macroscopic score (B), colonic length (C), colonic thickness (D), colonic MPO (E) and lung MPO (F) activity assessed in vehicle-treated normal mice (N) and in TNBS-treated mice administered with vehicle (CNT) or EphB4 5, 10, 20  $\mu\text{g/kg}$  (n=5-12 independent values per group). \*P<0.05 vs. N mice; #P<0.05 vs. CNT mice; one-way ANOVA followed by Bonferroni's post-test.

**Supplementary figure 2: DSS did not induce changes in spleen and MLN T cells profile**

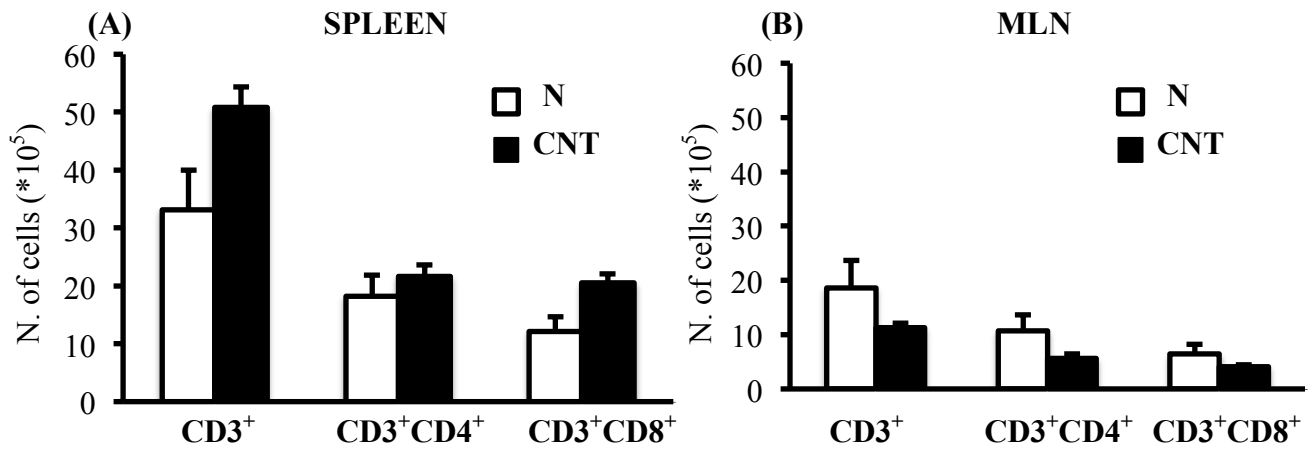

Number of T lymphocytes (CD3<sup>+</sup>), CD4<sup>+</sup> and CD8<sup>+</sup> T lymphocytes in the spleen (A) and in MLN (B) excised from vehicle-treated normal mice (N – white bars) and DSS-treated mice administered with vehicle (CNT – black bars) (n=5-8 independent values per group).
